# Supplementary material for: Expression of the Longest RGS4 Splice Variant in the Prefrontal Cortex Is Associated with Single Nucleotide Polymorphisms in Schizophrenia Patients
Source: PubMed Central journal article supplement (PMC4770186; doi:10.3389/fpsyt.2016.00026), 2016-02-29
Supplement: Table_2.pdf [file Table_2.pdf]

Supplementary Table 2. Demographics and tissue characteristics of the excluded samples\* from the Stanley Medical Research Institute (SMRI) Array collection.

|                            | Schizophrenia | Normal   | Bipolar Disorder |
|----------------------------|---------------|----------|------------------|
| Age (years, Mean±SD)       | 39±10         | 45±9     | 48±5             |
| Sex                        | 8F            | 4M 4F    | 4M 3F            |
| Race                       | 8W            | 8W       | 6W 1B            |
| Suicide status             | 1Y 7N         | N/A      | 3Y 4N            |
| Refrigerator interval (h)  | 4±2           | 3±2      | 18±18            |
| Postmortem interval (h)    | 28±13         | 31±13    | 47±17            |
| Brain pH                   | 6.4±0.2       | 6.6±0.3  | 6.3±0.4          |
| RIN                        | 8.4±0.6       | 7.9±1.0  | 7.0±1.5          |
| Brain weight (g)           | 1427±86       | 1438±137 | 1334±129         |
| Age of onset (year)        | 19±4          | N/A      | 31±10            |
| Duration of illness (year) | 20±10         | N/A      | 17±6             |
| Smoking at TOD             | 7Y 1U         | 2Y 1N 5U | 4Y 3N            |
| Psychotic feature          | 8Y            | N/A      | 5Y 2N            |
| Lifetime antipsychotics    | 8Y            | N/A      | 5Y 2N            |

M, Male, F, Female; W, White, H, Hispanic, NA, Native American; N, no, Y, yes, U, unknown, SD, standard deviation

\* These samples were excluded because: of loss of one sample during delivery, lack of sufficient RNA in the original sample obtained from SMRI, of the difference in Ct value higher than 0.5 between the replicates of the same sample, the samples were extreme outliers with respect to Ct value of endogenous controls and delta-Ct values of targets and the endogenous controls, and one was a case of CADASIL (cerebral autosomal dominant arteriopathy with subcortical infarcts and leukoencephalopathy).
